# Supplementary material for: Determinants of host feeding success by Anopheles farauti
Source: Springer Nature journal article supplement (doi:10.1186/s12936-016-1168-y), 2016-03-10
Supplement: MOESM1 [file 9762200]

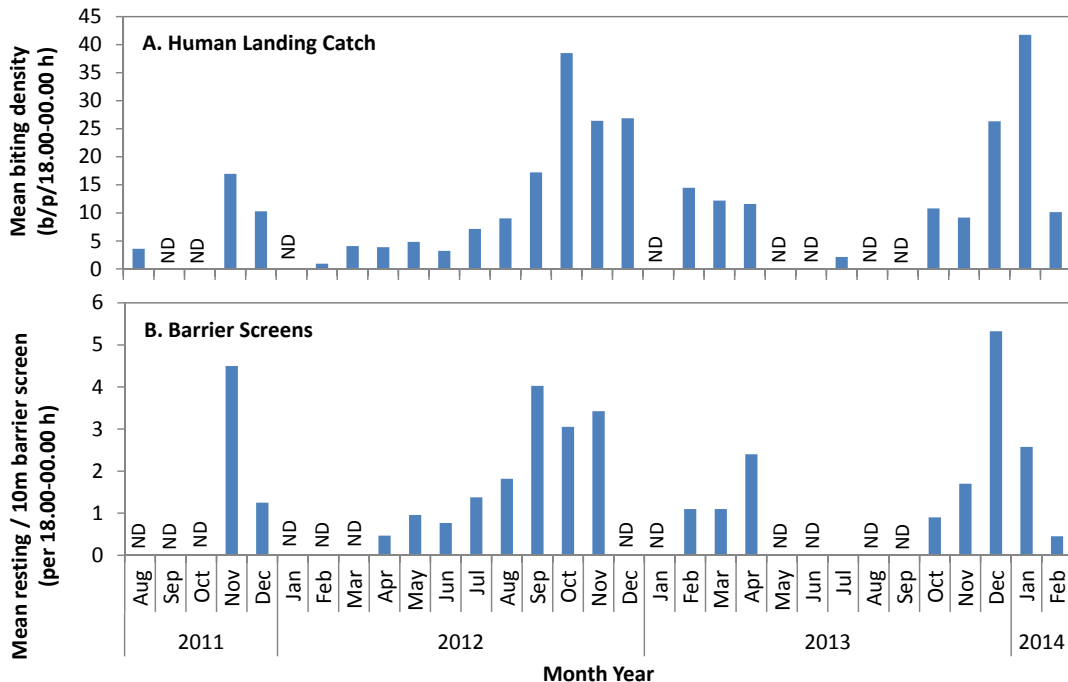

**Additional file 1** Graphical comparison of *An. farauti* densities caught with human landing catch (HLC) and on barrier screens in Haleta village, Central Province, Solomon Islands.

Note: b/p/18.00-00.00 h = bites/person/18.00-00.00 h.
